# Supplementary material
Source: PubMed Central journal article supplement (PMC5457164)
Supplement: NIHMS857646-supplement-Supplemental.pdf [file NIHMS857646-supplement-Supplemental.pdf]

| PREDICTED BONDS                 | SEQUENCE                         | SCORE          |
|---------------------------------|----------------------------------|----------------|
| $\alpha_2$ 5 – 962 $\delta$     | XMAAGCLLALT - LSKQSCITEQT        | 0.01037        |
| $\alpha_2$ 303 – 354 $\alpha_2$ | AQDVSCFQHLV - VSRANCKIIM         | 0.99715        |
| $\alpha_2$ 404 – 1047 $\delta$  | <b>IQWMACENKGY - KGPDVCFDNNV</b> | <b>0.99862</b> |
| $\alpha_2$ 507 – 987 $\delta$   | PRFTLCPNGYY - LDCGNCSRIFH        | 0.87141        |
| $\alpha_2$ 655 – 822 $\alpha_2$ | APREYCNDLKP - SIRDPCAGPVC        | 0.50051        |
| $\alpha_2$ 685 – 1012 $\delta$  | PNNPSCNTDLI - ESKGTCPCDTR        | 0.83708        |
| $\alpha_2$ 827 – 838 $\alpha_2$ | CAGPVCDCCKRN - SDVMDCVILDD       | 0.0104         |
| $\alpha_2$ 829 – 984 $\delta$   | GPVCDCKRNSD - SGLLDGNCSSR        | 0.99568        |
| $\alpha_2$ 892 – 1014 $\delta$  | DYQSVCDPGAA - KGTCPCDTRLL        | 0.99536        |
| $\delta$ 1032 – 1059 $\delta$   | DGPDPCMVKQ - EDYTDCGGVSG         | 0.01047        |

Aida Calderón-Rivera, Arturo Andrade, Oscar Hernández-Hernández, Ricardo González-Ramírez, Alejandro Sandoval, Manuel Rivera, Juan Carlos Gomora, Ricardo Felix

**Identification of a disulfide bridge essential for structure and function of the voltage-gated Ca<sup>2+</sup> channel  $\alpha_2\delta$ -1 auxiliary subunit**

Cell Calcium, Volume 51, Issue 1, 2012, 22–30

<http://dx.doi.org/10.1016/j.ceca.2011.10.002>

| Algorithm                               | Parameter                       | $\alpha_2$ | $\delta$ | $\alpha_2\delta$ |
|-----------------------------------------|---------------------------------|------------|----------|------------------|
| PROCHECK <sup>1</sup>                   | All-atom pairwise energy        | -3.67      | -3.26    | -3.68            |
|                                         | Solvation energy                | -4.14      | -5.28    | -4.93            |
|                                         | Torsion angle energy            | -5.86      | -3.5     | -5.15            |
|                                         | Secondary structure agreement   | -3.76      | -0.59    | -3.9             |
|                                         | Solvent accessibility agreement | -3.45      | -1.56    | -3.56            |
| Structure Z-scores <sup>2</sup>         | 2nd generation packing quality  | -4.072     | -3.491   | -4.052           |
|                                         | Ramachandran plot appearance    | -6.298     | -1.766   | -5.69            |
|                                         | chi-1/chi-2 rotamer normality   | 0.559      | 5.566    | 1.257            |
|                                         | Backbone conformation           | -16.585    | -8.516   | -15.73           |
| RMS Z-scores <sup>2</sup>               | Bond lengths                    | 1.678      | 0.896    | 1.631            |
|                                         | Bond angles                     | 2.305      | 0.568    | 2.156            |
|                                         | Omega angle restraints          | 3.824      | 0.989    | 3.588            |
|                                         | Side chain planarity            | 3.62       | 2.209    | 3.467            |
|                                         | Improper dihedral distribution  | 2.883      | 1.023    | 2.713            |
|                                         | Inside/Outside distribution     | 1.242      | 1.224    | 1.255            |
| Ramachandran plot residues <sup>2</sup> | Core                            | 57%        | 86.80%   | 61%              |
|                                         | Allowed region                  | 26.40%     | 12.40%   | 24.50%           |
|                                         | Generously Allowed Region       | 9.80%      | 0.80%    | 8.60%            |
|                                         | Total                           | 93.20%     | 100.00%  | 94.10%           |

The quality of the models was evaluated using the Protein Structure & Model Assessment Tool available at [http://swissmodel.expasy.org/workspace/index.php\\_func=tools\\_structureassessment1](http://swissmodel.expasy.org/workspace/index.php_func=tools_structureassessment1). Though the sequence of the full-length protein is unusual (long (1091 aa) for this analysis, the parameters maintained acceptable or medium scores as the initial template structures.

<sup>1</sup> Laskowski RA, MacArthur MW, Moss DS, Thornton JM (1993) PROCHECK: A program to check the stereochemical quality of protein structures. *J Appl Cryst* 26: 283-291.

<sup>2</sup> Hoof RW, Vriend G, Sander C, Abola EE. (1996) Errors in protein structures. *Nature* 381(6580): 272.

Aida Calderón-Rivera, Arturo Andrade, Oscar Hernández-Hernández, Ricardo González-Ramírez, Alejandro Sandoval, Manuel Rivera, Juan Carlos Gomora, Ricardo Felix

### Identification of a disulfide bridge essential for structure and function of the voltage-gated Ca<sup>2+</sup> channel $\alpha_2\delta$ -1 auxiliary subunit

Cell Calcium, Volume 51, Issue 1, 2012, 22–30

<http://dx.doi.org/10.1016/j.ceca.2011.10.002>

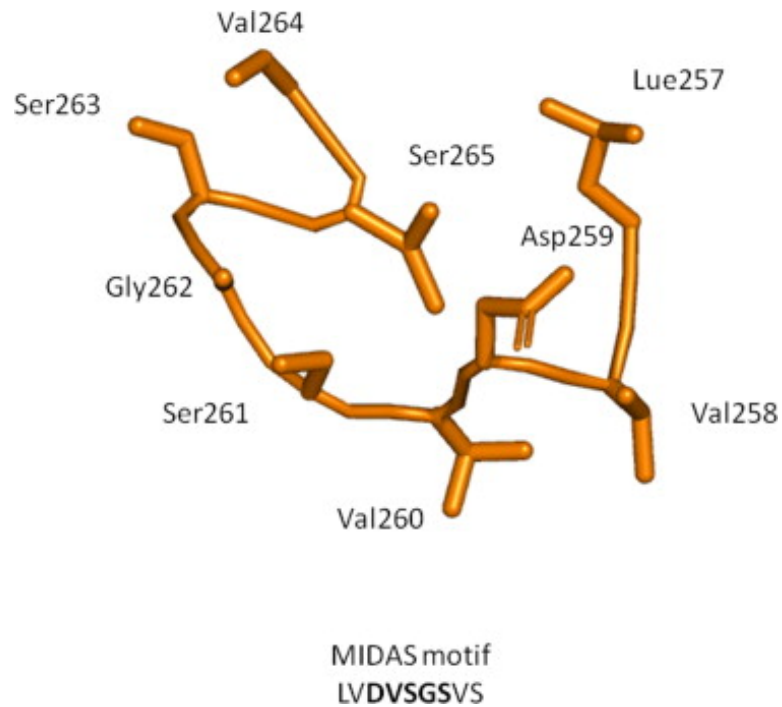

Aida Calderón-Rivera, Arturo Andrade, Oscar Hernández-Hernández, Ricardo González-Ramírez, Alejandro Sandoval, Manuel Rivera, Juan Carlos Gomora, Ricardo Felix

**Identification of a disulfide bridge essential for structure and function of the voltage-gated Ca<sup>2+</sup> channel  $\alpha_2\delta$ -1 auxiliary subunit**

Cell Calcium, Volume 51, Issue 1, 2012, 22–30

<http://dx.doi.org/10.1016/j.ceca.2011.10.002>

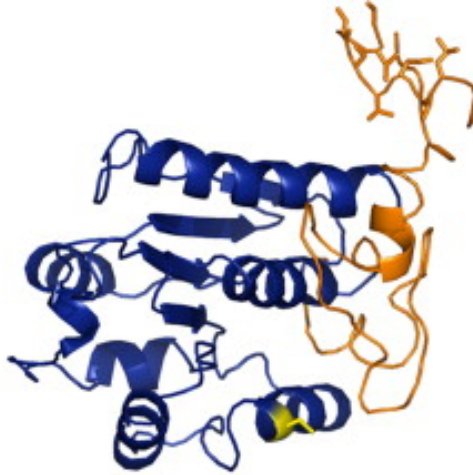

vWFA motif

```
DMLILVDVSGSVSGLTLKLIRTSVSEMLETLSDDDFVNVASFNSNAQDVSCFQHLVQANV  
RNKKVLKDAVNNITAKGITDYKKGFSFAFEQLLNYNVSRANCNKIIMLFTDGGEEAQQEI  
FAKYNKDKKVRVFTFSVGQHNYDRGPIQWMACENKGYEIPSIGAIRINTQEYLDVL
```

Rossmann fold: 259 LVDVSGSVS 265

Aida Calderón-Rivera, Arturo Andrade, Oscar Hernández-Hernández, Ricardo González-Ramírez, Alejandro Sandoval, Manuel Rivera, Juan Carlos Gomora, Ricardo Felix

**Identification of a disulfide bridge essential for structure and function of the voltage-gated Ca<sup>2+</sup> channel  $\alpha_2\delta$ -1 auxiliary subunit**

Cell Calcium, Volume 51, Issue 1, 2012, 22–30

<http://dx.doi.org/10.1016/j.ceca.2011.10.002>

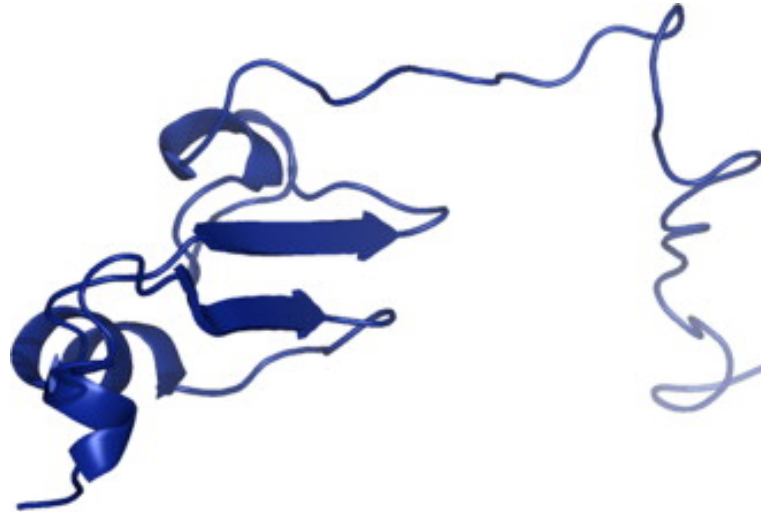

Cache motif

WTNVYLDALGLVITGTLPVFNVTGQSENKTNLKNQLILGVMGV  
DVSLEDIKRLTPRFTLCPNGYYFAIDPNGYVLLHPNLQPKPIGVGIP

Aida Calderón-Rivera, Arturo Andrade, Oscar Hernández-Hernández, Ricardo González-Ramírez, Alejandro Sandoval, Manuel Rivera, Juan Carlos Gomora, Ricardo Felix

**Identification of a disulfide bridge essential for structure and function of the voltage-gated Ca<sup>2+</sup> channel  $\alpha$ 2 $\delta$ -1 auxiliary subunit**

Cell Calcium, Volume 51, Issue 1, 2012, 22–30

<http://dx.doi.org/10.1016/j.ceca.2011.10.002>
